# Supplementary material for: Revisiting the bonding evolution theory: a fresh perspective on the ammonia pyramidal inversion and bond dissociations in ethane and borazane
Source: Royal Society of Chemistry journal article supplement (doi:10.1039/d3cp03572g), 2023-01-01
Supplement: d3cp03572g2.pdf [file d3cp03572g2.pdf]

## Electronic Supplementary Information

# Revisiting the Bonding Evolution Theory: A New Perspective on Ammonia Pyramidal Inversion and Bond Dissociations in Ethane and Borazane

Leandro Ayarde-Henríquez,<sup>\*ab</sup> Cristian Guerra,<sup>\*bcd</sup> Mario Duque-Noreña,<sup>be</sup> and Eduardo Chamorro<sup>\*be</sup>

<sup>a</sup>Trinity College Dublin, The University of Dublin. School of Physics, College Green Dublin 2, Ireland.

<sup>b</sup>Universidad Andrés Bello. Centro de Química Teórica y Computacional (CQT&C). Facultad de Ciencias Exactas. Santiago de Chile, Chile.

<sup>c</sup>Universidad Autónoma de Chile. Facultad de Ingeniería. Avenida Pedro de Valdivia 425, 7500912, Santiago de Chile, Chile.

<sup>d</sup>Universidad de Córdoba. Grupo de Química Computacional. Facultad de Ciencias Básicas. Carrera 6 No. 77-305, Montería-Córdoba, Colombia.

<sup>e</sup>Universidad Andrés Bello. Departamento de Ciencias Químicas. Facultad de Ciencias Exactas. Avenida República 275, 8370146, Santiago de Chile, Chile.

Correspondence to: [leandro.ayarde@tcd.ie](mailto:leandro.ayarde@tcd.ie) (L A-H )  
[c.querramadera@unandresbello.edu](mailto:c.querramadera@unandresbello.edu) (CG)  
[echamorro@unab.cl](mailto:echamorro@unab.cl) (EC)

## Contents

|                                                                                                                                          |    |
|------------------------------------------------------------------------------------------------------------------------------------------|----|
| 1. Optimized Cartesian coordinates for minima and TS of the pyramidal inversion of ammonia at DFT levels ..                              | 1  |
| 2. Optimized Cartesian coordinates for minima and TS of the pyramidal inversion of phosphine at DFT levels.                              | 3  |
| 3. Optimized Cartesian coordinates for minima and TS of the pyramidal inversion of arsine at DFT levels .....                            | 6  |
| 4. Optimized Cartesian coordinates for reactant and product of the ethane dissociation at CASSCF .....                                   | 7  |
| 5. Optimized Cartesian coordinates for reactant and products of the ammonia borane dissociation at DFT levels .....                      | 8  |
| Table S1. Performance of DFT levels for the pyramidal inversion of ammonia at P = 1.00 atm. ....                                         | 11 |
| Table S2. Performance of DFT levels for the pyramidal inversion of phosphine at P = 1.00 atm. ....                                       | 12 |
| Table S3. Performance of DFT levels for the pyramidal inversion of arsine at P = 1.00 atm. ....                                          | 12 |
| Table S4. Performance of CASSCF and CASPT2 methods combined with the 6-31(d) basis set for the ethane dissociation at P = 1.00 atm. .... | 12 |
| Table S5. Performance of DFT levels for the ammonia borane dissociation at P = 1.00 atm. ....                                            | 13 |

### 1. Optimized Cartesian coordinates for minima and TS of the pyramidal inversion of ammonia at DFT levels

$\omega$ B97X-D/6-31G(d)

#### Minima

|   |             |             |             |
|---|-------------|-------------|-------------|
| H | 0.00000000  | 0.93951400  | -0.31816900 |
| H | -0.81361300 | -0.46968000 | -0.31838100 |

|   |            |             |             |
|---|------------|-------------|-------------|
| H | 0.81361300 | -0.46968000 | -0.31838100 |
| N | 0.00000000 | -0.00001300 | 0.06938400  |

TS

|   |             |             |            |
|---|-------------|-------------|------------|
| H | 0.00000000  | 0.99973900  | 0.00000000 |
| H | -0.86579900 | -0.49986900 | 0.00000000 |
| H | 0.86579900  | -0.49986900 | 0.00000000 |
| N | 0.00000000  | 0.00000000  | 0.00000000 |

$\omega$ B97X-D/6-31G(d,p)

Minima

|   |             |             |             |
|---|-------------|-------------|-------------|
| H | 0.00000000  | 0.93820100  | -0.31804900 |
| H | -0.81247600 | -0.46902400 | -0.31826100 |
| H | 0.81247600  | -0.46902300 | -0.31826100 |
| N | 0.00000000  | -0.00001300 | 0.06902300  |

TS

|   |             |             |            |
|---|-------------|-------------|------------|
| H | 0.00000000  | 0.99775300  | 0.00000000 |
| H | -0.86408000 | -0.49887700 | 0.00000000 |
| H | 0.86408000  | -0.49887700 | 0.00000000 |
| N | 0.00000000  | 0.00000000  | 0.00000000 |

M06-2X/6-31G(d)

Minima

|   |             |             |             |
|---|-------------|-------------|-------------|
| H | 0.00023000  | 0.93853200  | -0.10127400 |
| H | -0.81269800 | -0.46946000 | -0.10127000 |
| H | 0.81314900  | -0.46945500 | -0.09750800 |
| N | -0.00068000 | 0.00038200  | 0.29161100  |

TS

|   |             |             |            |
|---|-------------|-------------|------------|
| H | 0.00000000  | 0.99997200  | 0.00000000 |
| H | -0.86600100 | -0.49998600 | 0.00000000 |

|   |            |             |            |
|---|------------|-------------|------------|
| H | 0.86600100 | -0.49998600 | 0.00000000 |
| N | 0.00000000 | 0.00000000  | 0.00000000 |

M06-2X/6-31G(d,p)

Minima

|   |             |             |             |
|---|-------------|-------------|-------------|
| H | 0.00021800  | 0.93740700  | -0.10072200 |
| H | -0.81173200 | -0.46888700 | -0.10071800 |
| H | 0.81215900  | -0.46888200 | -0.09713700 |
| N | -0.00064500 | 0.00036200  | 0.29013600  |

TS

|   |             |             |            |
|---|-------------|-------------|------------|
| H | 0.00000000  | 0.99825000  | 0.00000000 |
| H | -0.86449100 | -0.49913200 | 0.00000000 |
| H | 0.86449100  | -0.49913200 | 0.00000000 |
| N | 0.00000000  | 0.00001500  | 0.00000000 |

**2. Optimized Cartesian coordinates for minima and TS of the pyramidal inversion of phosphine at DFT levels**

$\omega$ B97X-D/6-31G(d)

Minima

|   |             |             |             |
|---|-------------|-------------|-------------|
| H | 0.00000000  | 1.19562400  | -0.69484600 |
| H | -1.03575700 | -0.59836200 | -0.69391400 |
| H | 1.03575700  | -0.59836200 | -0.69391400 |
| P | 0.00000000  | 0.00004600  | 0.06840700  |

TS

|   |             |             |            |
|---|-------------|-------------|------------|
| H | 0.00000000  | 1.38355500  | 0.00000000 |
| H | 1.19819400  | -0.69177800 | 0.00000000 |
| H | -1.19819400 | -0.69177800 | 0.00000000 |
| P | 0.00000000  | 0.00000000  | 0.00000000 |

$\omega$ B97X-D/6-31+G(df)

Minima

|   |             |             |             |
|---|-------------|-------------|-------------|
| H | -0.00000300 | 1.20133000  | -0.69274800 |
| H | -1.04073000 | -0.60121800 | -0.69182200 |
| H | 1.04073100  | -0.60122200 | -0.69182100 |
| P | 0.00000100  | 0.00005700  | 0.06212400  |

TS

|   |             |             |            |
|---|-------------|-------------|------------|
| H | 0.00000000  | 1.38142100  | 0.00000000 |
| H | 1.19634600  | -0.69071000 | 0.00000000 |
| H | -1.19634600 | -0.69071000 | 0.00000000 |
| P | 0.00000000  | 0.00000000  | 0.00000000 |

$\omega$ B97X-D/6-31+G(df,p)

Minima

|   |             |             |             |
|---|-------------|-------------|-------------|
| H | -0.00000100 | 1.19995200  | -0.69339300 |
| H | -1.03952400 | -0.60053000 | -0.69246600 |
| H | 1.03952400  | -0.60053200 | -0.69246600 |
| P | 0.00000100  | 0.00005700  | 0.06405800  |

TS

|   |             |             |            |
|---|-------------|-------------|------------|
| H | 0.00000000  | 1.38137900  | 0.00000000 |
| H | 1.19631000  | -0.69069000 | 0.00000000 |
| H | -1.19631000 | -0.69069000 | 0.00000000 |
| P | 0.00000000  | 0.00000000  | 0.00000000 |

M06-2X/6-31G(d)

Minima

|   |             |             |             |
|---|-------------|-------------|-------------|
| H | 0.00000000  | 1.18986600  | -0.69605600 |
| H | -1.03035800 | -0.59554500 | -0.69520700 |
| H | 1.03035800  | -0.59554600 | -0.69520700 |
| P | 0.00000000  | 0.00017100  | 0.07220400  |

TS

|   |             |             |            |
|---|-------------|-------------|------------|
| H | 0.00000000  | 1.37991900  | 0.00000000 |
| H | 1.19504500  | -0.68995900 | 0.00000000 |
| H | -1.19504500 | -0.68995900 | 0.00000000 |
| P | 0.00000000  | 0.00000000  | 0.00000000 |

M06-2X/6-31+G(df)

Minima

|   |             |             |             |
|---|-------------|-------------|-------------|
| H | 0.00000000  | 1.19589600  | -0.69388200 |
| H | -1.03563000 | -0.59853300 | -0.69299600 |
| H | 1.03563000  | -0.59853300 | -0.69299600 |
| P | 0.00000000  | 0.00011700  | 0.06560700  |

TS

|   |             |             |             |
|---|-------------|-------------|-------------|
| H | 0.00000000  | 1.19589600  | -0.69388200 |
| H | -1.03563000 | -0.59853300 | -0.69299600 |
| H | 1.03563000  | -0.59853300 | -0.69299600 |
| P | 0.00000000  | 0.00011700  | 0.06560700  |

M06-2X/6-31+G(df,p)

Minima

|   |             |             |             |
|---|-------------|-------------|-------------|
| H | 0.00000000  | 1.19531000  | -0.69427300 |
| H | -1.03512100 | -0.59824200 | -0.69339000 |
| H | 1.03512100  | -0.59824200 | -0.69339000 |
| P | 0.00000000  | 0.00012100  | 0.06678600  |

TS

|   |             |             |            |
|---|-------------|-------------|------------|
| H | 0.00000000  | 1.37892600  | 0.00000000 |
| H | 1.19418500  | -0.68946300 | 0.00000000 |
| H | -1.19418500 | -0.68946300 | 0.00000000 |
| P | 0.00000000  | 0.00000000  | 0.00000000 |

### 3. Optimized Cartesian coordinates for minima and TS of the pyramidal inversion of arsine at DFT levels

$\omega$ B97X-D/6-31+G(df)

#### Minima

|    |             |             |             |
|----|-------------|-------------|-------------|
| H  | -0.00000300 | 1.26769500  | -0.82746500 |
| H  | -1.09795900 | -0.63376500 | -0.82742500 |
| H  | 1.09796100  | -0.63377000 | -0.82742400 |
| As | 0.00000200  | -0.00000800 | 0.02753200  |

#### TS

|    |             |             |            |
|----|-------------|-------------|------------|
| H  | 0.00000000  | 1.47339200  | 0.00000000 |
| H  | 1.27599500  | -0.73669600 | 0.00000000 |
| H  | -1.27599500 | -0.73669600 | 0.00000000 |
| As | 0.00000000  | 0.00000000  | 0.00000000 |

$\omega$ B97X-D/6-31+G(df,p)

#### Minima

|    |             |             |             |
|----|-------------|-------------|-------------|
| H  | 0.00000000  | 1.24817100  | -0.82186300 |
| H  | -1.08105500 | -0.62400200 | -0.82181700 |
| H  | 1.08105500  | -0.62400200 | -0.82181700 |
| As | 0.00000000  | -0.00001500 | 0.01071400  |

#### TS

|    |             |             |            |
|----|-------------|-------------|------------|
| H  | 0.00000000  | 1.44901300  | 0.00000000 |
| H  | 1.25488200  | -0.72450600 | 0.00000000 |
| H  | -1.25488200 | -0.72450600 | 0.00000000 |
| As | 0.00000000  | 0.00000000  | 0.00000000 |

M06-2X/6-31+G(df)

#### Minima

|   |             |             |             |
|---|-------------|-------------|-------------|
| H | 0.00000000  | 1.27028900  | -0.82683200 |
| H | -1.10017900 | -0.63503900 | -0.82675700 |

|    |            |             |             |
|----|------------|-------------|-------------|
| H  | 1.10017900 | -0.63503900 | -0.82675700 |
| As | 0.00000000 | -0.00005900 | 0.02556300  |

TS

|    |             |             |            |
|----|-------------|-------------|------------|
| H  | 0.00000000  | 1.47843500  | 0.00000000 |
| H  | 1.28036200  | -0.73921700 | 0.00000000 |
| H  | -1.28036200 | -0.73921700 | 0.00000000 |
| As | 0.00000000  | 0.00000000  | 0.00000000 |

M06-2X/6-31+G(df,p)

Minima

|    |             |             |             |
|----|-------------|-------------|-------------|
| H  | 0.00000000  | 1.25134700  | -0.82111400 |
| H  | -1.08357100 | -0.62560000 | -0.82108000 |
| H  | 1.08357100  | -0.62559900 | -0.82107900 |
| As | 0.00000000  | 0.00000300  | 0.00849000  |

TS

|    |             |             |            |
|----|-------------|-------------|------------|
| H  | 0.00000000  | 1.45350800  | 0.00000000 |
| H  | 1.25877500  | -0.72675400 | 0.00000000 |
| H  | -1.25877500 | -0.72675400 | 0.00000000 |
| As | 0.00000000  | 0.00000000  | 0.00000000 |

**4. Optimized Cartesian coordinates for reactant and product of the ethane dissociation at CASSCF**

CASSCF(6,6)/6-31G(d)

Reactant

|   |           |           |           |
|---|-----------|-----------|-----------|
| C | -0.763558 | -0.000026 | -0.000246 |
| C | 0.763558  | 0.000026  | 0.000246  |
| H | -1.160710 | 0.964058  | 0.334571  |
| H | -1.160155 | -0.771730 | 0.667832  |
| H | -1.160574 | -0.192005 | -1.002556 |

|   |          |           |           |
|---|----------|-----------|-----------|
| H | 1.160574 | 0.192005  | 1.002556  |
| H | 1.160155 | 0.771730  | -0.667832 |
| H | 1.160710 | -0.964058 | -0.334571 |

Product

|   |           |           |           |
|---|-----------|-----------|-----------|
| C | 7.538573  | 0.000040  | 0.000144  |
| C | -7.538543 | -0.000033 | -0.000168 |
| H | 7.555901  | 0.498551  | -0.959589 |
| H | 7.542983  | -1.080503 | 0.048472  |
| H | 7.538592  | 0.582131  | 0.911802  |
| H | -7.540428 | -0.216566 | -1.059869 |
| H | -7.553200 | 1.025889  | 0.342171  |
| H | -7.544024 | -0.809545 | 0.717157  |

**5. Optimized Cartesian coordinates for reactant and products of the ammonia borane dissociation at DFT levels**

$\omega$ B97X-D/6-31G(d)

Reactant

|   |             |             |             |
|---|-------------|-------------|-------------|
| B | 0.93053100  | 0.00000600  | 0.00000500  |
| H | 1.23920100  | -0.52975500 | -1.04837000 |
| H | 1.23922200  | 1.17280600  | 0.06544400  |
| H | 1.23927000  | -0.64305200 | 0.98295400  |
| N | -0.72814600 | 0.00000000  | -0.00000200 |
| H | -1.09101900 | -0.94939400 | -0.05349900 |
| H | -1.09107700 | 0.42836200  | 0.84892800  |
| H | -1.09100200 | 0.52103500  | -0.79545200 |

Ammonia

|   |             |             |             |
|---|-------------|-------------|-------------|
| N | -2.35474700 | 0.00126700  | 0.00064600  |
| H | -2.73871500 | -0.93968500 | -0.00857200 |
| H | -2.74461700 | 0.46158200  | 0.81858700  |



|   |             |            |             |
|---|-------------|------------|-------------|
| H | -2.74398300 | 0.47728200 | -0.80856400 |
|---|-------------|------------|-------------|

Borane

|   |            |             |             |
|---|------------|-------------|-------------|
| B | 2.80475400 | -0.00009400 | -0.00054100 |
| H | 2.80644400 | -0.50869800 | -1.08293500 |
| H | 2.80634600 | 1.19158100  | 0.10029600  |
| H | 2.80151800 | -0.68322400 | 0.98109100  |

$\omega$ B97X-D/6-31G(d,p)

Reactant

|   |             |             |             |
|---|-------------|-------------|-------------|
| B | 0.92836500  | 0.00000400  | 0.00000400  |
| H | 1.23800300  | -0.52911300 | -1.04706800 |
| H | 1.23801700  | 1.17135700  | 0.06534900  |
| H | 1.23807000  | -0.64224100 | 0.98174700  |
| N | -0.72898500 | -0.00000300 | -0.00000200 |
| H | -1.08882300 | -0.94871900 | -0.05347800 |
| H | -1.08887100 | 0.42804100  | 0.84833200  |
| H | -1.08879500 | 0.52068100  | -0.79487600 |

Ammonia

|   |             |             |             |
|---|-------------|-------------|-------------|
| N | -2.35511000 | 0.00126600  | 0.00064600  |
| H | -2.73860000 | -0.93837200 | -0.00855900 |
| H | -2.74449300 | 0.46093600  | 0.81744400  |
| H | -2.74385900 | 0.47661500  | -0.80743400 |

Borane

|   |            |             |             |
|---|------------|-------------|-------------|
| B | 2.80475900 | -0.00009300 | -0.00054100 |
| H | 2.80644100 | -0.50824800 | -1.08197500 |
| H | 2.80634300 | 1.19052600  | 0.10020700  |
| H | 2.80151900 | -0.68261900 | 0.98022100  |

## M06-2X/6-31G(d)

Reactant

|   |             |             |             |
|---|-------------|-------------|-------------|
| B | 0.93387200  | 0.00001900  | 0.00001500  |
| H | 1.23768200  | -0.52757500 | -1.04451000 |
| H | 1.23777700  | 1.16836800  | 0.06536200  |
| H | 1.23778100  | -0.64080300 | 0.97914400  |
| N | -0.72685200 | 0.00001900  | 0.00003500  |
| H | -1.09103700 | -0.95018900 | -0.05332100 |
| H | -1.09120100 | 0.42892700  | 0.84953600  |
| H | -1.09104100 | 0.52124100  | -0.79625400 |

Ammonia

|   |             |             |             |
|---|-------------|-------------|-------------|
| N | -2.35177800 | 0.00128400  | 0.00065500  |
| H | -2.73971000 | -0.93888100 | -0.00857800 |
| H | -2.74560200 | 0.46118700  | 0.81788800  |
| H | -2.74497200 | 0.47685600  | -0.80786800 |

Borane

|   |            |             |             |
|---|------------|-------------|-------------|
| B | 2.80476600 | -0.00010800 | -0.00050000 |
| H | 2.80643300 | -0.50649500 | -1.07834400 |
| H | 2.80633500 | 1.18653000  | 0.09980900  |
| H | 2.80152800 | -0.68036100 | 0.97694700  |

## M06-2X/6-31G(d,p)

Reactant

|   |             |             |             |
|---|-------------|-------------|-------------|
| B | 0.93148100  | 0.00002000  | 0.00001400  |
| H | 1.23617000  | -0.52698900 | -1.04349700 |
| H | 1.23627600  | 1.16719600  | 0.06536600  |
| H | 1.23627600  | -0.64022000 | 0.97812700  |
| N | -0.72809400 | 0.00002200  | 0.00003800  |
| H | -1.08831100 | -0.94961300 | -0.05320600 |
| H | -1.08849300 | 0.42874100  | 0.84897600  |

H -1.08832400 0.52085100 -0.79581200

Ammonia

N -2.35326700 0.00127800 0.00065500

H -2.73921800 -0.93775200 -0.00856900

H -2.74510300 0.46063700 0.81690800

H -2.74447400 0.47628400 -0.80689800

Borane

B 2.80476700 -0.00010700 -0.00050100

H 2.80643100 -0.50609500 -1.07749000

H 2.80633400 1.18559100 0.09973000

H 2.80153000 -0.67982300 0.97617300

**Table S1.** Performance of DFT levels for the pyramidal inversion of ammonia at P = 1.00 atm.

| Level                      | $\Delta H_{T=0}^\ddagger$ [kcalmol <sup>-1</sup> ] | Absolute Error [kcalmol <sup>-1</sup> ] <sup>a</sup> |
|----------------------------|----------------------------------------------------|------------------------------------------------------|
| $\omega$ B97X-D/6-31G(d)   | 4.93                                               | 0.33                                                 |
| $\omega$ B97X-D/6-31G(d,p) | 4.48                                               | 0.78                                                 |
| M06-2X/6-31G(d)            | 5.43                                               | 0.17                                                 |
| M06-2X/6-31G(d,p)          | 4.81                                               | 0.45                                                 |

<sup>a</sup>  $\Delta H_{\text{exp}}^\ddagger(T) = E_a - RT = 5.31 \text{ kcalmol}^{-1}$  at 298 K (see M. F. Manning, *J Chem Phys*, 1935, **3**, 136–138).

$\Delta H_{\text{exp}}^\ddagger(T) = E_a - RT = 5.21 \text{ kcalmol}^{-1}$  at 298 K (see C. C. Costain and G. B. M. Sutherland, *J Phys Chem*, 1952, **56**, 321–324). The absolute error was computed using the average of the experimental values.

**Table S2.** Performance of DFT levels for the pyramidal inversion of phosphine at P = 1.00 atm.

| Level                        | $\Delta H_{T=0}^\ddagger$ [kcalmol <sup>-1</sup> ] | Absolute Error [kcalmol <sup>-1</sup> ] <sup>a</sup> |
|------------------------------|----------------------------------------------------|------------------------------------------------------|
| $\omega$ B97X-D/6-31G(d)     | 33.80                                              | 10.05                                                |
| $\omega$ B97X-D/6-31+G(df)   | 31.18                                              | 7.43                                                 |
| $\omega$ B97X-D/6-31+G(df,p) | 31.11                                              | 7.36                                                 |
| M06-2X/6-31G(d)              | 34.68                                              | 10.93                                                |
| M06-2X/6-31+G(df)            | 31.86                                              | 8.11                                                 |
| M06-2X/6-31+G(df,p)          | 31.80                                              | 8.05                                                 |

<sup>a</sup>  $\Delta H_{\text{exp}}^\ddagger(T) = E_a - RT = 30.99 \text{ kcalmol}^{-1}$  at 298 K (see R. E. Weston, , J Am Chem Soc, 1954, **76**, 2645–2648).

$\Delta H_{\text{exp}}^\ddagger(T) = E_a - RT = 16.51 \text{ kcalmol}^{-1}$  at 298 K (see C. C. Costain and G. B. M. Sutherland, *J Phys Chem*, 1952, **56**, 321–324). The absolute error was computed using the average of the experimental values.

**Table S3.** Performance of DFT levels for the pyramidal inversion of arsine at P = 1.00 atm.

| Level                        | $\Delta H_{T=0}^\ddagger$ [kcalmol <sup>-1</sup> ] | Absolute Error [kcalmol <sup>-1</sup> ] <sup>a</sup> |
|------------------------------|----------------------------------------------------|------------------------------------------------------|
| $\omega$ B97X-D/6-31+G(df)   | 39.33                                              | 7.82                                                 |
| $\omega$ B97X-D/6-31+G(df,p) | 37.60                                              | 6.09                                                 |
| M06-2X/6-31+G(df)            | 36.76                                              | 5.25                                                 |
| M06-2X/6-31+G(df,p)          | 35.22                                              | 3.71                                                 |

<sup>a</sup>  $\Delta H_{\text{exp}}^\ddagger(T) = E_a - RT = 31.51 \text{ kcalmol}^{-1}$  at 298 K (see C. C. Costain and G. B. M. Sutherland, *J Phys Chem*, 1952, **56**, 321–324).

**Table S4.** Performance of CASSCF and CASPT2 methods combined with the 6-31(d) basis set for the ethane dissociation at P = 1.00 atm.

| Level       | $\Delta H_{\text{diss},0\text{K}}$ [kcalmol <sup>-1</sup> ] | $\Delta H_{\text{diss},298\text{K}}$ [kcalmol <sup>-1</sup> ] | Absolute Error [kcalmol <sup>-1</sup> ] <sup>a</sup> |
|-------------|-------------------------------------------------------------|---------------------------------------------------------------|------------------------------------------------------|
| CASSCF(6,6) | 88.04                                                       | 80.79                                                         | -                                                    |
| CASSCF(8,8) | 77.47                                                       | 66.61                                                         | -                                                    |
| CASPT2(6,6) | 95.58                                                       | 88.34                                                         | 1.56                                                 |
| CASPT2(8,8) | 92.64                                                       | 81.75                                                         | 8.15                                                 |

<sup>a</sup>  $\Delta H_{\text{diss}}^0(\text{exp}) = 89.9 \text{ kcalmol}^{-1}$  at 298 K (see A. Haaland, *Chem Int Ed Engl*, 1989, **28**, 992–1007). The absolute error was computed for CASPT2 only.

**Table S5.** Performance of DFT levels for the ammonia borane dissociation at P = 1.00 atm.

| Level                      | $\Delta H_{diss,0K}^0$ [kcalmol <sup>-1</sup> ] | $\Delta H_{diss,298K}^0$ [kcalmol <sup>-1</sup> ] | Absolute Error [kcalmol <sup>-1</sup> ] <sup>a</sup> |
|----------------------------|-------------------------------------------------|---------------------------------------------------|------------------------------------------------------|
| $\omega$ B97X-D/6-31G(d)   | 29.30                                           | 31.11                                             | 3.19                                                 |
| $\omega$ B97X-D/6-31G(d,p) | 28.79                                           | 30.59                                             | 3.71                                                 |
| M06-2X/6-31G(d)            | 30.17                                           | 31.97                                             | 2.33                                                 |
| M06-2X/6-31G(d,p)          | 29.64                                           | 31.45                                             | 2.85                                                 |

<sup>a</sup>  $\Delta H_{diss}^0$  (exp) = 31.1 kcalmol<sup>-1</sup> at 298 K (see A. Haaland, Chem Int Ed Engl, 1989, 28, 992–1007). <sup>a</sup>

$\Delta H_{diss}^0$  (exp) = 37.5 kcalmol<sup>-1</sup> at 298 K (see L. V. Gurvich, I. V. Veys and C. B. Alcock, *Thermodynamic Properties of Individual Substances*, 4th edn., 1994, Vol. 3.). The absolute error was computed for enthalpies at 298 K taking the average of experimental values.
